# Supplementary material
Source: PubMed Central journal article supplement (PMC3035937)
Supplement: NIHMS258851-supplement-01.pdf [file NIHMS258851-supplement-01.pdf]

**Table S1.** Strains used in this study

| Strain                     | Genotype                                                                                              | Source      |
|----------------------------|-------------------------------------------------------------------------------------------------------|-------------|
| JSP303                     | <i>h<sup>+</sup> leu1-32 his3-D1</i>                                                                  | C. Hoffman  |
| JSP303-Y4 ( <i>myh1</i> Δ) | <i>h<sup>+</sup> myh1::his3<sup>+</sup> leu1-32 his3-D1</i>                                           | A-L. Lu     |
| Hu303                      | <i>h<sup>-</sup></i>                                                                                  | K. Ekwall   |
| Hu1481                     | <i>h<sup>-</sup> hst4Δ::KanMX6</i>                                                                    | K. Ekwall   |
| Hu802                      | <i>h<sup>-</sup> clr6-1</i>                                                                           | K. Ekwall   |
| Hu1098                     | <i>h<sup>-</sup> sir2Δ::KanMX6</i>                                                                    | K. Ekwall   |
| Hu1500                     | <i>h<sup>-</sup> leu1-32 ura4-D18 ade6-M210 hst4<sup>+</sup>-6XMYC::KanMX</i>                         | This work   |
| Hst4-MYC <i>myh1</i> Δ     | <i>h<sup>-</sup> myh1:: his3<sup>+</sup> leu1-32 ura4-D18 ade6-M210 hst4<sup>+</sup>-6XMYC::KanMX</i> | This work   |
| FY526                      | <i>h<sup>+</sup> his3-D1 ade6-M216 leu1-32 ura4-D18</i>                                               | S. Forsburg |
| Hus1-MYC                   | <i>h<sup>-</sup> leu1-32 ura4-D18 ade6-706 hus1-MYC</i>                                               | A. Carr     |
| Hus1-MYC <i>myh1</i> Δ     | <i>h<sup>-</sup> myh1::LEU2 leu1-32 ura4-D18 ade6-706 hus1-MYC</i>                                    | This work   |
