# Supplementary material
Source: PubMed Central journal article supplement (PMC3035937)
Supplement: NIHMS258851-supplement-03.pdf [file NIHMS258851-supplement-03.pdf]

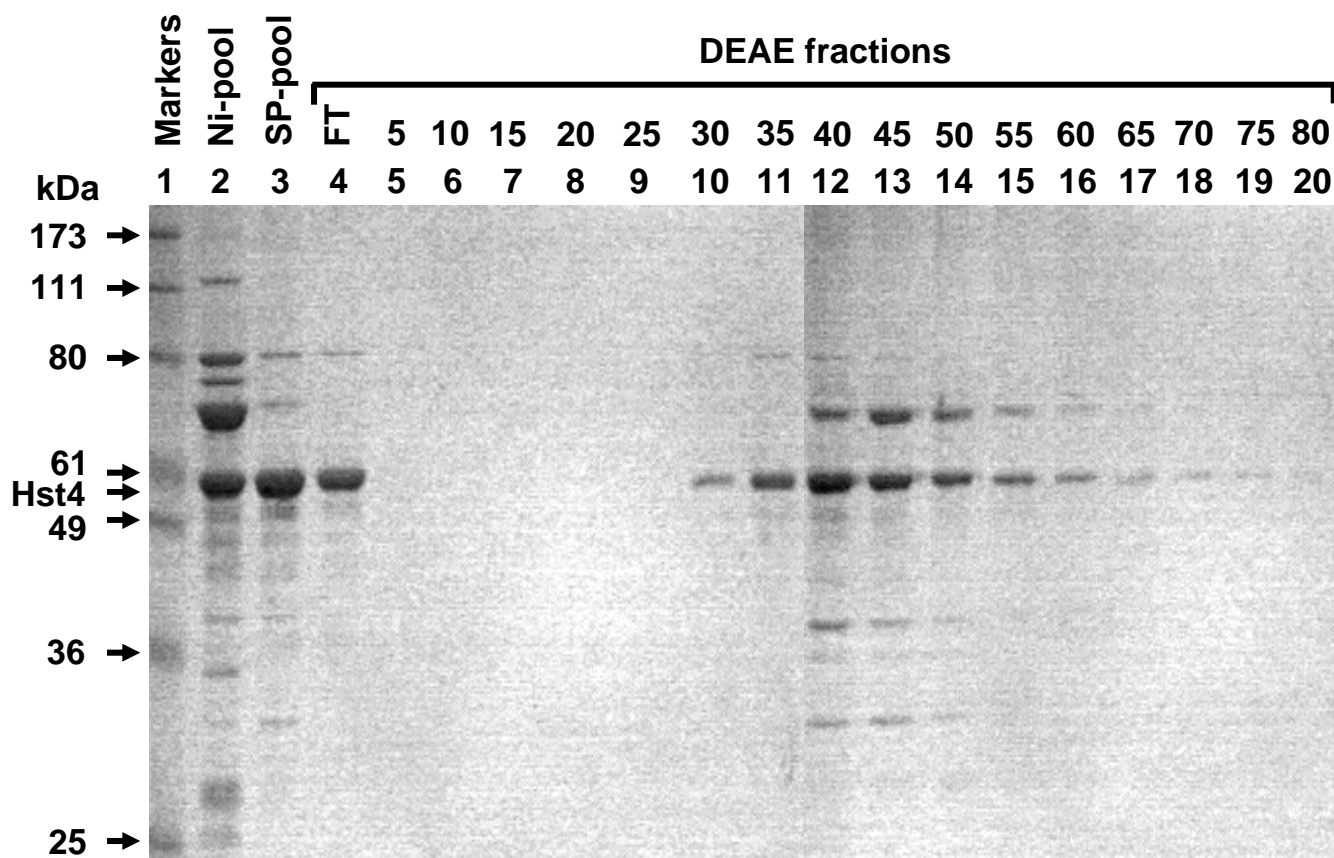

**Fig. S1.** Purification of His-tagged SpHst4. His-tagged SpHst4 was expressed in *E. coli* Rosetta cells and purified by Ni-NTA, Sp, and DEAE columns. Lane 1 contains the molecular weight markers. Lanes 2 and 3 contain the pooled fractions from Ni and SP columns, respectively. Lanes 4-20 are the fractions from the DEAE column. FT, flow through fraction. The proteins were fractionated on a 10% polyacrylamide gel in the presence of SDS and stained with Coomassie Blue. Most of SpHst4 was found in the flow through fraction (lane 4).
